# Supplementary material for: Effects of calcination and reduction temperature on the properties of Ni-P/SiO2 and Ni-P/Al2O3 and their hydrodenitrogenation performance
Source: Royal Society of Chemistry journal article supplement (doi:10.1039/c7ra11907k), 2018-01-01
Supplement: c7ra11907k1.pdf [file c7ra11907k1.pdf]

## Supporting information

### Effects of calcination and reduction temperature on the property of Ni-P/SiO<sub>2</sub>, Ni-P/Al<sub>2</sub>O<sub>3</sub> and its hydrodenitrogenation performance

Mingqiang Shao<sup>a,b</sup>, Haitao Cui<sup>a\*</sup>, Shaoqing Guo<sup>c</sup>, Liangfu Zhao<sup>a</sup>, Yisheng Tan<sup>a</sup>

a. Institute of Coal Chemistry, Chinese Academy of Sciences, Taiyuan 030001, People's Republic of China.

b. Graduate University of the Chinese Academy of Sciences, Beijing 100039, People's Republic of China.

c. Taiyuan University of Science and Technology, Taiyuan 030024, People's Republic of China.

E-mail address: [cuiht@sxicc.ac.cn](mailto:cuiht@sxicc.ac.cn)

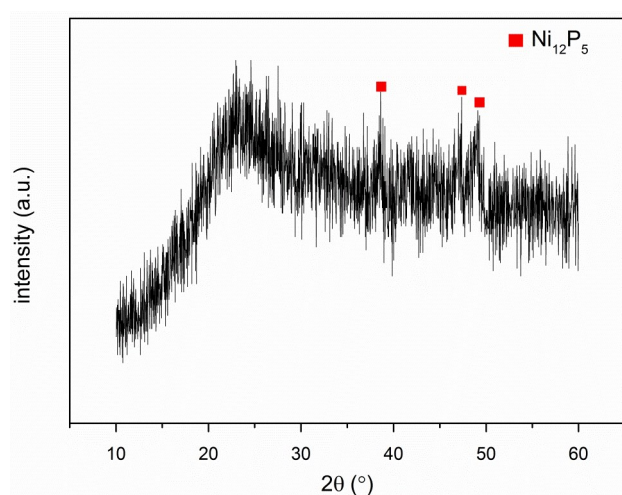

a

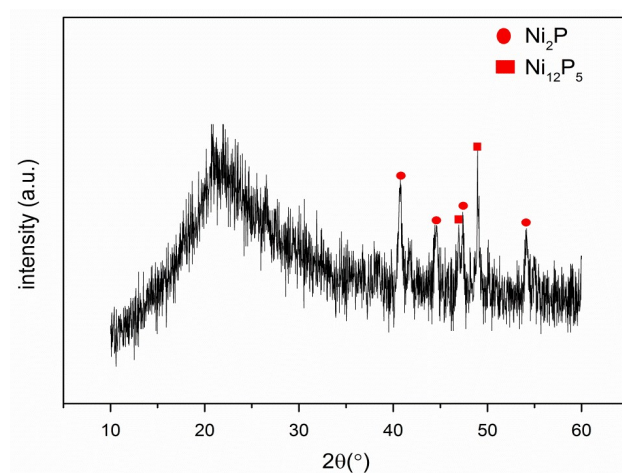

b

Figure S1. XRD patterns of Ni-P<sub>440</sub>/SiO<sub>2</sub> reduced at (a) 460 °C, (b) 520 °C.

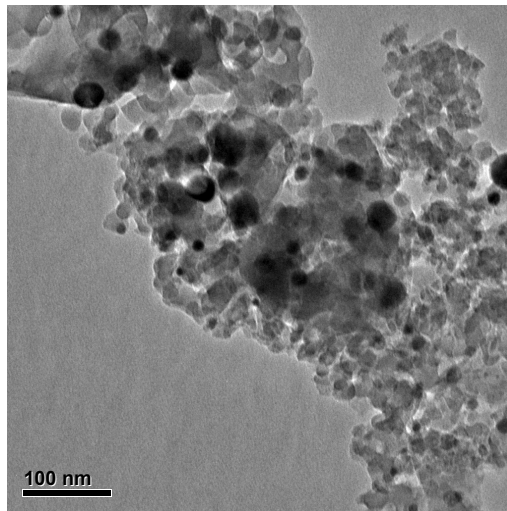

**Figure S2.** HRTEM image of Ni-P/<sup>750</sup>SiO<sub>2</sub>.

**Table S1.** The true and theoretical consumption of H<sub>2</sub> and the molar ratio of true consumption of H<sub>2</sub> to theoretical consumption of H<sub>2</sub> for Ni-P<sub>x</sub>/SiO<sub>2</sub> (x= 440, 500, 560, 620) at a heating rate of 10 °C/min.

| Samples                               | True consumption of H <sub>2</sub> (mol) | Theoretical consumption of H <sub>2</sub> (mol) | The molar ratio of true consumption of H <sub>2</sub> to theoretical consumption of H <sub>2</sub> |
|---------------------------------------|------------------------------------------|-------------------------------------------------|----------------------------------------------------------------------------------------------------|
| Ni-P <sub>440</sub> /SiO <sub>2</sub> | 1.703*10 <sup>-4</sup>                   | 1.809*10 <sup>-4</sup>                          | 94.14 %                                                                                            |
| Ni-P <sub>500</sub> /SiO <sub>2</sub> | 1.684*10 <sup>-4</sup>                   | 1.809*10 <sup>-4</sup>                          | 93.09 %                                                                                            |
| Ni-P <sub>560</sub> /SiO <sub>2</sub> | 1.691*10 <sup>-4</sup>                   | 1.802*10 <sup>-4</sup>                          | 93.84 %                                                                                            |
| Ni-P <sub>620</sub> /SiO <sub>2</sub> | 1.619*10 <sup>-4</sup>                   | 1.745*10 <sup>-4</sup>                          | 92.81 %                                                                                            |

**Table S2.** The true and theoretical consumption of H<sub>2</sub> and the molar ratio of true consumption of H<sub>2</sub> to theoretical consumption of H<sub>2</sub> for Ni-P<sub>x</sub>/Al<sub>2</sub>O<sub>3</sub> (x= 440, 500, 560, 620) at a heating rate of 10 °C/min.

| Samples                                             | True consumption of H <sub>2</sub> (mol) | Theoretical consumption of H <sub>2</sub> (mol) | The molar ratio of true consumption of H <sub>2</sub> to theoretical consumption of H <sub>2</sub> |
|-----------------------------------------------------|------------------------------------------|-------------------------------------------------|----------------------------------------------------------------------------------------------------|
| Ni-P <sub>440</sub> /Al <sub>2</sub> O <sub>3</sub> | 0.957*10 <sup>-4</sup>                   | 1.053*10 <sup>-4</sup>                          | 90.9 %                                                                                             |
| Ni-P <sub>500</sub> /Al <sub>2</sub> O <sub>3</sub> | 0.941*10 <sup>-4</sup>                   | 1.053*10 <sup>-4</sup>                          | 89.4 %                                                                                             |
| Ni-P <sub>560</sub> /Al <sub>2</sub> O <sub>3</sub> | 0.895*10 <sup>-4</sup>                   | 1.007*10 <sup>-4</sup>                          | 88.9 %                                                                                             |
| Ni-P <sub>620</sub> /Al <sub>2</sub> O <sub>3</sub> | 0.807*10 <sup>-4</sup>                   | 0.96*10 <sup>-4</sup>                           | 84.1 %                                                                                             |

**Table S3.** Py-IR spectra for Ni-P<sup>560</sup><sub>440</sub>/SiO<sub>2</sub>, Ni-P<sup>560</sup><sub>500</sub>/SiO<sub>2</sub>, Ni-P<sup>560</sup><sub>560</sub>/SiO<sub>2</sub>, Ni-P<sup>560</sup><sub>620</sub>/SiO<sub>2</sub>, Ni-P<sup>750</sup><sub>440</sub>/Al<sub>2</sub>O<sub>3</sub>, Ni-P<sup>750</sup><sub>500</sub>/Al<sub>2</sub>O<sub>3</sub>, Ni-P<sup>750</sup><sub>560</sub>/Al<sub>2</sub>O<sub>3</sub> and Ni-P<sup>750</sup><sub>620</sub>/Al<sub>2</sub>O<sub>3</sub>.

| Samples                                                            | Brønsted acidity (μmol/g) |       | Lewis acidity (μmol/g) |       |
|--------------------------------------------------------------------|---------------------------|-------|------------------------|-------|
|                                                                    | 100°C                     | 200°C | 100°C                  | 200°C |
| Ni-P <sup>560</sup> <sub>440</sub> /SiO <sub>2</sub>               | 31                        | 19    | 58                     | 32    |
| Ni-P <sup>560</sup> <sub>500</sub> /SiO <sub>2</sub>               | 27                        | 19    | 61                     | 29    |
| Ni-P <sup>560</sup> <sub>560</sub> /SiO <sub>2</sub>               | 28                        | 17    | 57                     | 29    |
| Ni-P <sup>560</sup> <sub>620</sub> /SiO <sub>2</sub>               | 23                        | 15    | 57                     | 28    |
| Ni-P <sup>750</sup> <sub>440</sub> /Al <sub>2</sub> O <sub>3</sub> | 37                        | 23    | 173                    | 129   |
| Ni-P <sup>750</sup> <sub>500</sub> /Al <sub>2</sub> O <sub>3</sub> | 37                        | 21    | 174                    | 126   |
| Ni-P <sup>750</sup> <sub>560</sub> /Al <sub>2</sub> O <sub>3</sub> | 35                        | 22    | 169                    | 127   |
| Ni-P <sup>750</sup> <sub>620</sub> /Al <sub>2</sub> O <sub>3</sub> | 33                        | 17    | 172                    | 128   |
